# Supplementary material for: The Response of Sugar Beet (Beta vulgaris L.) Genotypes at Different Ploidy Levels to Salt (NaCl) Stress
Source: MDPI journal article supplement (doi:10.3390/ijpb14010017), 2023-01-30
Supplement: s1 [file s1]

A

Anova,  $F(4,36) = 186.89$ ,  $p = <0.0001$ ,  $\eta_p^2 = 0.95$ 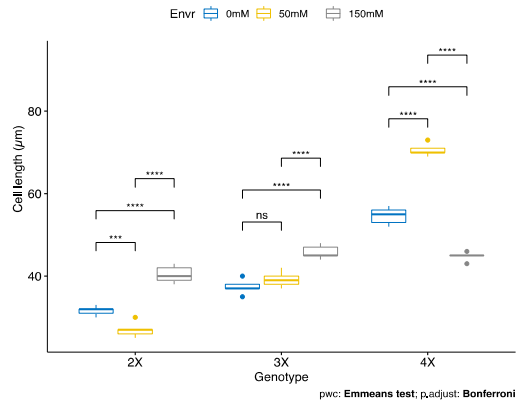

B

Anova,  $F(4,36) = 218.55$ ,  $p = <0.0001$ ,  $\eta_p^2 = 0.96$ 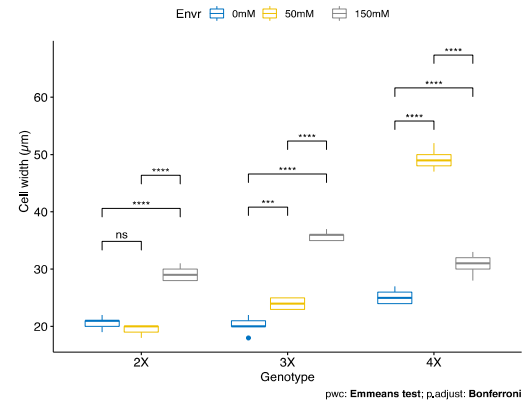

C

Anova,  $F(4,36) = 75.18$ ,  $p = <0.0001$ ,  $\eta_p^2 = 0.89$ 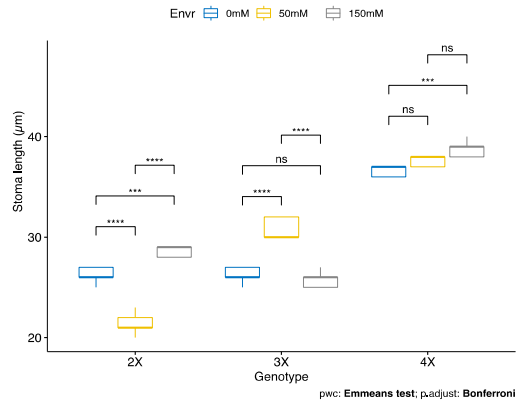

D

Anova,  $F(4,36) = 4.7$ ,  $p = 0.004$ ,  $\eta_p^2 = 0.34$ 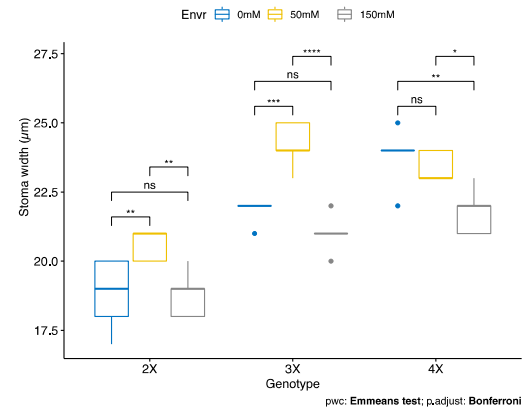

E

Anova,  $F(4,36) = 2.57$ ,  $p = 0.055$ ,  $\eta_p^2 = 0.22$ 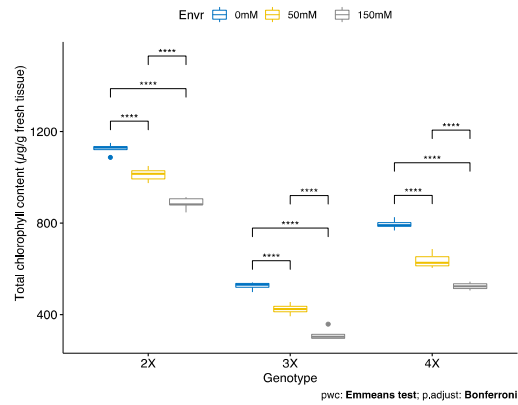

**Table S1.** Variance analysis tables. ns: non-significant; \*significant at  $P < 0.05$ ; \*\*significant at  $P < 0.005$ ; \*\*\*significant at  $P < 0.001$ .

| Germination |    |        |         |          |            |
|-------------|----|--------|---------|----------|------------|
| Effect      | Df | Sum Sq | Mean Sq | F value  | Pr(>F)     |
| G           | 2  | 15434  | 7717    | 8367.783 | <2e-16 *** |
| E           | 2  | 9335   | 4667    | 5060.916 | <2e-16 *** |
| G X E       | 4  | 1153   | 288     | 312.675  | <2e-16 *** |
| Residual    | 36 | 33     | 1       |          |            |

| Salt tolerance index |    |        |         |          |              |
|----------------------|----|--------|---------|----------|--------------|
| Effect               | Df | Sum Sq | Mean Sq | F value  | Pr(>F)       |
| G                    | 2  | 0.2377 | 0.1188  | 135.421  | <2e-16 ***   |
| E                    | 2  | 2.7795 | 1.3898  | 1583.826 | <2e-16 ***   |
| G X E                | 4  | 0.1281 | 0.032   | 36.496   | 3.32E-12 *** |
| Residual             | 36 | 0.0316 | 0.0009  |          |              |

| Seedling height |    |        |         |          |              |
|-----------------|----|--------|---------|----------|--------------|
| Effect          | Df | Sum Sq | Mean Sq | F value  | Pr(>F)       |
| G               | 2  | 84.19  | 42.1    | 1572.058 | < 2e-16 ***  |
| E               | 2  | 27.46  | 13.73   | 512.722  | < 2e-16 ***  |
| G X E           | 4  | 3.99   | 1       | 37.29    | 2.44E-12 *** |
| Residual        | 36 | 0.96   | 0.03    |          |              |

| Root length (Seedling) |    |        |         |         |              |
|------------------------|----|--------|---------|---------|--------------|
| Effect                 | Df | Sum Sq | Mean Sq | F value | Pr(>F)       |
| G                      | 2  | 6.2    | 3.1     | 99.295  | 2.23E-15 *** |
| E                      | 2  | 27.723 | 13.862  | 443.964 | < 2e-16 ***  |
| G X E                  | 4  | 0.732  | 0.183   | 5.858   | 0.000976 *** |
| Residual               | 36 | 1.124  | 0.031   |         |              |

| Shoot height (Vegetative) |    |        |         |          |              |
|---------------------------|----|--------|---------|----------|--------------|
| Effect                    | Df | Sum Sq | Mean Sq | F value  | Pr(>F)       |
| G                         | 2  | 1017.8 | 508.9   | 8267.397 | < 2e-16 ***  |
| E                         | 2  | 418.2  | 209.1   | 3397.314 | < 2e-16 ***  |
| G X E                     | 4  | 6      | 1.5     | 24.48    | 7.61E-10 *** |
| Residual                  | 36 | 2.2    | 0.1     |          |              |

| Root length (Vegetative) |    |        |         |          |             |
|--------------------------|----|--------|---------|----------|-------------|
| Effect                   | Df | Sum Sq | Mean Sq | F value  | Pr(>F)      |
| G                        | 2  | 334    | 166.98  | 2451.576 | < 2e-16 *** |
| E                        | 2  | 322.1  | 161.05  | 2364.512 | < 2e-16 *** |
| G X E                    | 4  | 5.8    | 1.46    | 21.39    | 4.2E-09 *** |
| Residual                 | 36 | 2.5    | 0.07    |          |             |

| Leaf length |    |        |         |         |             |
|-------------|----|--------|---------|---------|-------------|
| Effect      | Df | Sum Sq | Mean Sq | F value | Pr(>F)      |
| G           | 2  | 31.71  | 15.857  | 294.86  | < 2e-16 *** |
| E           | 2  | 35.4   | 17.698  | 329.087 | < 2e-16 *** |
| G X E       | 4  | 4.44   | 1.11    | 20.645  | 6.5E-09 *** |
| Residual    | 36 | 1.94   | 0.054   |         |             |

| Leaf width |    |        |         |         |              |
|------------|----|--------|---------|---------|--------------|
| Effect     | Df | Sum Sq | Mean Sq | F value | Pr(>F)       |
| G          | 2  | 11.783 | 5.892   | 225.634 | < 2e-16 ***  |
| E          | 2  | 9.99   | 4.995   | 191.294 | < 2e-16 ***  |
| G X E      | 4  | 0.772  | 0.193   | 7.387   | 0.000188 *** |
| Residual   | 36 | 0.94   | 0.026   |         |              |

| Leaf area |    |        |         |         |             |
|-----------|----|--------|---------|---------|-------------|
| Effect    | Df | Sum Sq | Mean Sq | F value | Pr(>F)      |
| G         | 2  | 464.4  | 232.18  | 214.593 | < 2e-16 *** |
| E         | 2  | 565.6  | 282.82  | 261.392 | < 2e-16 *** |
| G X E     | 4  | 119.9  | 29.97   | 27.703  | 1.5E-10 *** |
| Residual  | 36 | 39     | 1.08    |         |             |

| Fresh weight |    |        |         |          |             |
|--------------|----|--------|---------|----------|-------------|
| Effect       | Df | Sum Sq | Mean Sq | F value  | Pr(>F)      |
| G            | 2  | 236.17 | 118.08  | 2121.273 | < 2e-16 *** |
| E            | 2  | 172.02 | 86.01   | 1545.082 | < 2e-16 *** |
| G X E        | 4  | 10.05  | 2.51    | 45.154   | 1.5E-13 *** |
| Residual     | 36 | 2      | 0.06    |          |             |

| Dry matter |    |        |         |         |              |
|------------|----|--------|---------|---------|--------------|
| Effect     | Df | Sum Sq | Mean Sq | F value | Pr(>F)       |
| G          | 2  | 30.406 | 15.203  | 877.09  | < 2e-16 ***  |
| E          | 2  | 8.067  | 4.034   | 232.705 | < 2e-16 ***  |
| G X E      | 4  | 1.948  | 0.487   | 28.09   | 1.24E-10 *** |
| Residual   | 36 | 0.624  | 0.017   |         |              |

| Tissue water content |    |        |         |          |             |
|----------------------|----|--------|---------|----------|-------------|
| Effect               | Df | Sum Sq | Mean Sq | F value  | Pr(>F)      |
| G                    | 2  | 142.71 | 71.35   | 2078.272 | < 2e-16 *** |
| E                    | 2  | 107.19 | 53.59   | 1560.99  | < 2e-16 *** |
| G X E                | 4  | 10.7   | 2.67    | 77.913   | < 2e-16 *** |
| Residual             | 36 | 1.24   | 0.03    |          |             |

| Total chlorophyll content |    |         |         |          |            |
|---------------------------|----|---------|---------|----------|------------|
| Effect                    | Df | Sum Sq  | Mean Sq | F value  | Pr(>F)     |
| G                         | 2  | 2624504 | 1312252 | 2160.678 | <2e-16 *** |
| E                         | 2  | 433791  | 216895  | 357.127  | <2e-16 *** |
| G X E                     | 4  | 6235    | 1559    | 2.566    | 0.055 ns   |
| Residual                  | 36 | 21864   | 607     |          |            |

| Cell number |    |        |         |          |            |
|-------------|----|--------|---------|----------|------------|
| Effect      | Df | Sum Sq | Mean Sq | F value  | Pr(>F)     |
| G           | 2  | 29478  | 14739   | 1394.841 | <2e-16 *** |
| E           | 2  | 21266  | 10633   | 1006.261 | <2e-16 *** |
| G X E       | 4  | 5852   | 1463    | 138.456  | <2e-16 *** |
| Residual    | 36 | 380    | 11      |          |            |

| Cell length |    |        |         |         |              |
|-------------|----|--------|---------|---------|--------------|
| Effect      | Df | Sum Sq | Mean Sq | F value | Pr(>F)       |
| G           | 2  | 4364   | 2181.8  | 738.188 | < 2e-16 ***  |
| E           | 2  | 146    | 73      | 24.684  | 1.78E-07 *** |
| G X E       | 4  | 2209   | 552.4   | 186.887 | < 2e-16 ***  |
| Residual    | 36 | 106    | 3       |         |              |

| Cell width |    |        |         |         |            |
|------------|----|--------|---------|---------|------------|
| Effect     | Df | Sum Sq | Mean Sq | F value | Pr(>F)     |
| G          | 2  | 1137.6 | 568.8   | 304.714 | <2e-16 *** |
| E          | 2  | 892.1  | 446.1   | 238.964 | <2e-16 *** |
| G X E      | 4  | 1631.9 | 408     | 218.554 | <2e-16 *** |
| Residual   | 36 | 67.2   | 1.9     |         |            |

| Cell area |    |          |         |         |            |
|-----------|----|----------|---------|---------|------------|
| Effect    | Df | Sum Sq   | Mean Sq | F value | Pr(>F)     |
| G         | 2  | 13553450 | 6776725 | 700.442 | <2e-16 *** |
| E         | 2  | 4002440  | 2001220 | 206.846 | <2e-16 *** |
| G X E     | 4  | 14035074 | 3508768 | 362.666 | <2e-16 *** |
| Residual  | 36 | 348298   | 9675    |         |            |

| Cell width/length index |    |         |         |         |              |
|-------------------------|----|---------|---------|---------|--------------|
| Effect                  | Df | Sum Sq  | Mean Sq | F value | Pr(>F)       |
| G                       | 2  | 0.05441 | 0.02721 | 16.626  | 7.69E-06 *** |
| E                       | 2  | 0.25444 | 0.12722 | 77.748  | 8.6E-14 ***  |
| G X E                   | 4  | 0.0927  | 0.02318 | 14.163  | 4.89E-07 *** |
| Residual                | 36 | 0.05891 | 0.00164 |         |              |

| Stoma number |    |        |         |         |              |
|--------------|----|--------|---------|---------|--------------|
| Effect       | Df | Sum Sq | Mean Sq | F value | Pr(>F)       |
| G            | 2  | 624.4  | 312.2   | 151.881 | < 2e-16 ***  |
| E            | 2  | 55.6   | 27.8    | 13.524  | 4.16E-05 *** |
| G X E        | 4  | 857.2  | 214.3   | 104.254 | < 2e-16 ***  |
| Residual     | 36 | 74     | 2.06    |         |              |

| Stoma length |    |        |         |         |              |
|--------------|----|--------|---------|---------|--------------|
| Effect       | Df | Sum Sq | Mean Sq | F value | Pr(>F)       |
| G            | 2  | 1283.2 | 641.6   | 931.387 | < 2e-16 ***  |
| E            | 2  | 16.6   | 8.3     | 12.032  | 9.96E-05 *** |
| G X E        | 4  | 207.2  | 51.8    | 75.177  | < 2e-16 ***  |
| Residual     | 36 | 24.8   | 0.7     |         |              |

| Stoma width |    |        |         |         |              |
|-------------|----|--------|---------|---------|--------------|
| Effect      | Df | Sum Sq | Mean Sq | F value | Pr(>F)       |
| G           | 2  | 110.04 | 55.02   | 78.603  | 7.33E-14 *** |
| E           | 2  | 36.58  | 18.29   | 26.127  | 9.78E-08 *** |
| G X E       | 4  | 13.16  | 3.29    | 4.698   | 0.00373 ***  |
| Residual    | 36 | 25.2   | 0.7     |         |              |

| Stoma area |    |         |         |         |              |
|------------|----|---------|---------|---------|--------------|
| Effect     | Df | Sum Sq  | Mean Sq | F value | Pr(>F)       |
| G          | 2  | 1088574 | 544287  | 445.767 | < 2e-16 ***  |
| E          | 2  | 20749   | 10374   | 8.497   | 0.000949 *** |
| G X E      | 4  | 126965  | 31741   | 25.996  | 3.48E-10 *** |
| Residual   | 36 | 43956   | 1221    |         |              |

| Stoma width/length index |    |        |         |         |              |
|--------------------------|----|--------|---------|---------|--------------|
| Effect                   | Df | Sum Sq | Mean Sq | F value | Pr(>F)       |
| G                        | 2  | 0.345  | 0.17251 | 180.94  | < 2e-16 ***  |
| E                        | 2  | 0.0956 | 0.04782 | 50.154  | 3.91E-11 *** |
| G X E                    | 4  | 0.1942 | 0.04855 | 50.92   | 2.47E-14 *** |
| Residual                 | 36 | 0.0343 | 0.00095 |         |              |

| Shoot Na <sup>+</sup> concentration |    |        |         |           |            |
|-------------------------------------|----|--------|---------|-----------|------------|
| Effect                              | Df | Sum Sq | Mean Sq | F value   | Pr(>F)     |
| G                                   | 2  | 4.84   | 2.42    | 688.402   | <2e-16 *** |
| E                                   | 2  | 73     | 36.5    | 10385.894 | <2e-16 *** |
| G X E                               | 4  | 2.38   | 0.6     | 169.653   | <2e-16 *** |
| Residual                            | 36 | 0.13   | 0       |           |            |

| Shoot K <sup>+</sup> concentration |    |        |         |          |            |
|------------------------------------|----|--------|---------|----------|------------|
| Effect                             | Df | Sum Sq | Mean Sq | F value  | Pr(>F)     |
| G                                  | 2  | 2.109  | 1.054   | 479.795  | <2e-16 *** |
| E                                  | 2  | 29.94  | 14.97   | 6811.427 | <2e-16 *** |
| G X E                              | 4  | 1.15   | 0.288   | 130.863  | <2e-16 *** |
| Residual                           | 36 | 0.079  | 0.002   |          |            |

| Shoot Na <sup>+</sup> /K <sup>+</sup> ratio |    |        |         |          |            |
|---------------------------------------------|----|--------|---------|----------|------------|
| Effect                                      | Df | Sum Sq | Mean Sq | F value  | Pr(>F)     |
| G                                           | 2  | 6.47   | 3.237   | 807.801  | <2e-16 *** |
| E                                           | 2  | 48.55  | 24.275  | 6056.896 | <2e-16 *** |
| G X E                                       | 4  | 5.65   | 1.412   | 352.205  | <2e-16 *** |
| Residual                                    | 36 | 0.14   | 0.004   |          |            |

| Root Na <sup>+</sup> concentration |    |        |         |          |            |
|------------------------------------|----|--------|---------|----------|------------|
| Effect                             | Df | Sum Sq | Mean Sq | F value  | Pr(>F)     |
| G                                  | 2  | 3.29   | 1.646   | 1108.756 | <2e-16 *** |
| E                                  | 2  | 47.41  | 23.704  | 15968.16 | <2e-16 *** |
| G X E                              | 4  | 1.95   | 0.487   | 328.105  | <2e-16 *** |
| Residual                           | 36 | 0.05   | 0.001   |          |            |

| Root K <sup>+</sup> concentration |    |        |         |          |            |
|-----------------------------------|----|--------|---------|----------|------------|
| Effect                            | Df | Sum Sq | Mean Sq | F value  | Pr(>F)     |
| G                                 | 2  | 3.42   | 1.712   | 544.402  | <2e-16 *** |
| E                                 | 2  | 50.45  | 25.227  | 8022.567 | <2e-16 *** |
| G X E                             | 4  | 1.97   | 0.493   | 156.859  | <2e-16 *** |
| Residual                          | 36 | 0.11   | 0.003   |          |            |

| Root Na <sup>+</sup> /K <sup>+</sup> ratio |    |        |         |          |            |
|--------------------------------------------|----|--------|---------|----------|------------|
| Effect                                     | Df | Sum Sq | Mean Sq | F value  | Pr(>F)     |
| G                                          | 2  | 0.875  | 0.438   | 1749.079 | <2e-16 *** |
| E                                          | 2  | 8.114  | 4.057   | 16219.7  | <2e-16 *** |
| G X E                                      | 4  | 0.528  | 0.132   | 527.404  | <2e-16 *** |
| Residual                                   | 36 | 0.009  | 0       |          |            |

**Table S2** Loading values and percentage contribution of variables on the axis identified by the principal component analysis (PCA) for all cultivars under control and saline conditions

| Variable        | Dim. 1         |                              |                           | Dim. 2         |                              |                           | Dim. 3         |                              |                           |
|-----------------|----------------|------------------------------|---------------------------|----------------|------------------------------|---------------------------|----------------|------------------------------|---------------------------|
|                 | Loading values | Contribution of variable (%) | Quality of representation | Loading values | Contribution of variable (%) | Quality of representation | Loading values | Contribution of variable (%) | Quality of representation |
| GP              | -0.897         | 5.133                        | 0.804                     | 0.024          | 0.009                        | 0.001                     | -0.361         | 4.011                        | 0.130                     |
| SH              | 0.017          | 0.002                        | 0.000                     | -0.718         | 7.929                        | 0.516                     | -0.540         | 8.955                        | 0.291                     |
| RL              | 0.887          | 5.019                        | 0.786                     | 0.214          | 0.702                        | 0.046                     | -0.296         | 2.686                        | 0.087                     |
| SLV             | -0.897         | 5.140                        | 0.805                     | -0.262         | 1.058                        | 0.069                     | -0.322         | 3.194                        | 0.104                     |
| RLV             | -0.963         | 5.915                        | 0.927                     | 0.062          | 0.059                        | 0.004                     | -0.224         | 1.549                        | 0.050                     |
| LL              | -0.833         | 4.431                        | 0.694                     | 0.414          | 2.628                        | 0.171                     | -0.184         | 1.040                        | 0.034                     |
| LW              | -0.933         | 5.552                        | 0.870                     | -0.019         | 0.006                        | 0.000                     | -0.261         | 2.096                        | 0.068                     |
| LA              | -0.891         | 5.069                        | 0.794                     | 0.161          | 0.400                        | 0.026                     | -0.225         | 1.550                        | 0.050                     |
| FW              | -0.893         | 5.087                        | 0.797                     | 0.275          | 1.161                        | 0.076                     | -0.320         | 3.141                        | 0.102                     |
| DW              | -0.822         | 4.309                        | 0.675                     | -0.350         | 1.885                        | 0.123                     | -0.388         | 4.640                        | 0.151                     |
| RWC             | -0.810         | 4.189                        | 0.656                     | 0.485          | 3.611                        | 0.235                     | -0.249         | 1.904                        | 0.062                     |
| CHL             | -0.816         | 4.248                        | 0.665                     | -0.183         | 0.513                        | 0.033                     | -0.524         | 8.441                        | 0.274                     |
| CNB             | -0.500         | 1.598                        | 0.250                     | -0.588         | 5.309                        | 0.346                     | 0.465          | 6.651                        | 0.216                     |
| CL              | 0.268          | 0.457                        | 0.072                     | 0.886          | 12.074                       | 0.786                     | -0.096         | 0.283                        | 0.009                     |
| CW              | 0.510          | 1.661                        | 0.260                     | 0.578          | 5.134                        | 0.334                     | -0.361         | 4.009                        | 0.130                     |
| CA              | 0.328          | 0.685                        | 0.107                     | 0.727          | 8.128                        | 0.529                     | -0.260         | 2.083                        | 0.068                     |
| CWLI            | 0.477          | 1.455                        | 0.228                     | -0.432         | 2.868                        | 0.187                     | -0.586         | 10.576                       | 0.344                     |
| SN              | 0.297          | 0.562                        | 0.088                     | -0.531         | 4.324                        | 0.281                     | 0.284          | 2.485                        | 0.081                     |
| SL              | 0.232          | 0.344                        | 0.054                     | 0.909          | 12.684                       | 0.826                     | -0.108         | 0.360                        | 0.012                     |
| SW              | 0.155          | 0.154                        | 0.024                     | 0.633          | 6.152                        | 0.400                     | 0.576          | 10.187                       | 0.331                     |
| SA              | 0.211          | 0.283                        | 0.044                     | 0.922          | 13.071                       | 0.851                     | 0.115          | 0.405                        | 0.013                     |
| SWLI            | -0.193         | 0.239                        | 0.037                     | -0.704         | 7.605                        | 0.495                     | 0.415          | 5.296                        | 0.172                     |
| STI             | -0.921         | 5.418                        | 0.849                     | 0.208          | 0.662                        | 0.043                     | 0.232          | 1.660                        | 0.054                     |
| SNA             | 0.933          | 5.554                        | 0.870                     | -0.162         | 0.401                        | 0.026                     | -0.287         | 2.526                        | 0.082                     |
| SK              | -0.939         | 5.623                        | 0.881                     | 0.098          | 0.149                        | 0.010                     | 0.285          | 2.491                        | 0.081                     |
| RNAK            | 0.906          | 5.238                        | 0.821                     | -0.183         | 0.514                        | 0.033                     | -0.204         | 1.281                        | 0.042                     |
| RNA             | 0.936          | 5.599                        | 0.877                     | -0.133         | 0.272                        | 0.018                     | -0.278         | 2.371                        | 0.077                     |
| RK              | -0.936         | 5.589                        | 0.875                     | 0.124          | 0.236                        | 0.015                     | 0.285          | 2.501                        | 0.081                     |
| RNAK            | 0.924          | 5.450                        | 0.854                     | -0.172         | 0.456                        | 0.030                     | -0.230         | 1.626                        | 0.053                     |
| Eigenvalue      |                | 15.665                       |                           |                | 6.509                        |                           |                | 3.252                        |                           |
| Variability (%) |                | 54.017                       |                           |                | 22.444                       |                           |                | 11.212                       |                           |

|                   |        |        |        |
|-------------------|--------|--------|--------|
| Cumulative<br>(%) | 54.017 | 76.461 | 87.673 |
|-------------------|--------|--------|--------|

---
